# Supplementary material
Source: publisher site journal article supplement (https://www.dovepress.com/article/supplementary_file/618256/618256%20Revised%20Supplementary%20Material.docx)
Supplement: Supplementary file 1 [file 618256%20Revised%20Supplementary%20Material.docx]

**Table S1. Patients’ characteristics**

| **Characteristics**  **(Mean ± SD / n (%))** | **Included patients (n=1,302)** | **Excluded patients (n=994)** | ***P* value** |
| --- | --- | --- | --- |
| Age, years | 60.4 ± 10.7 | 60.1 ± 11.9 | 0.606 |
| Sex |  |  | 0.104 |
| Male | 734 (56.4) | 594 (59.8) |  |
| Female | 568 (43.6) | 400 (40.2) |  |
| Smoking status |  |  | 0.876 |
| Non-smokers | 1,030 (79.1) | 789 (79.4) |  |
| Smokers | 272 (20.9) | 205 (20.6) |  |
| Marital status |  |  | 0.865 |
| Married/de facto/partner | 1,263 (97.0) | 963 (96.9) |  |
| Divorced/widowed/single | 39 (3.0) | 31 (3.1) |  |
| Education |  |  | 0.357 |
| Junior high school and below | 1,183 (90.9) | 914 (92.0) |  |
| Senior high school and above | 119 (9.1) | 80 (8.0) |  |
| Employment |  |  | 0.069 |
| Employed | 940 (72.2) | 683 (68.7) |  |
| Retired/Unemployed | 362 (27.8) | 311(31.3) |  |
| BMI, kg/m2 | 23.7 ± 3.4 | 24.1 ± 3.7 | 0.004 |
| CCI |  |  | < 0.001 |
| 0 | 482 (37.0) | 284 (28.5) |  |
| 1 | 395 (30.3) | 313 (31.5) |  |
| 2 | 272 (20.9) | 248 (25.0) |  |
| >2 | 153 (11.8) | 149 (15.0) |  |
| Surgical procedure |  |  | < 0.001 |
| Heart valve surgery | 790 (60.7) | 433 (43.6) |  |
| CABG | 306 (23.5) | 376 (37.8) |  |
| Ascending aorta replacement | 25 (1.9) | 67 (6.7) |  |
| Heart valve surgery and/or  CABG and/or  ascending aorta replacement | 181 (13.9) | 118 (11.9) |  |
| Time of operation, hours | 5.3 ± 1.5 | 5.3 ± 1.9 | 0.656 |

Data are presented as mean ± SD or n (%). BMI, body mass index; CABG, Coronary Artery Bypass Grafting; CCI, Charlson Comorbidity Index; SD, standard deviation.

**Table S2.** **Incidence of AKI stratified by KDIGO criteria**

| **Criteria, n (%)** | **SCr criteria** | **UO criteria** | **Overall** |
| --- | --- | --- | --- |
| Non-AKI | 816 (62.6) | 1,295 (99.4) | 815 (62.6) |
| Stage 1 | 298 (23.0) | 4 (0.3) | 299 (23.0) |
| Stage 2 | 132 (10.1) | 2 (0.2) | 132 (10.1) |
| Stage 3 | 56 (4.3) | 1 (0.1) | 56 (4.3) |
| Any AKIcategory | 486 (37.4) | 7 (0.6) | 487 (37.4) |

KDIGO, Kidney Disease Improving Global Outcome; SCr, serum creatine; UO, urine output.
